# Supplementary material for: Fine-Tuning Heat Stress Algorithms to Optimise Global Predictions of Mass Coral Bleaching
Source: MDPI journal article supplement (doi:10.3390/rs13142677), 2021-07-07
Supplement: s1 [file s1]

Archive with 1 entries (1 files):
- remotesensing-1265118-supplementary.pdf
